# Supplementary material for: Levels and Concentration Ratios of Polychlorinated Biphenyls and Polybrominated Diphenyl Ethers in Serum and Breast Milk in Japanese Mothers
Source: PubMed Central journal article supplement (PMC1552037; doi:10.1289/ehp.9032), 2006-04-18
Supplement: ehp0114-001179s1.pdf [file ehp0114-001179s1.pdf]

Supplementary table 1. Questionnaire

**An exposure assessment questionnaire for polybrominated diphenyl ethers: the nursing mother study**

Age ( )  
Present city of residence ( )  
Numbers of delivery ( )  
Nursing period (week) ( )

Please answer the following questions. We appreciate your cooperation in taking the time to fill in the answers. We will later statistically analyze them in order to search for any possible predictors for the levels of polybrominated diphenyl ethers present in your serum or breast milk.

1. Please describe briefly your residential history within the last 5 years as is shown in the example. If you have lived in another country or countries, please describe the names of the particular cities, with the duration and time period of residence.

| <u>City</u>            | <u>Time period</u> | <u>Duration of residence</u> |
|------------------------|--------------------|------------------------------|
| e.g. Hyogo Nishinomiya | 2000-2002          | 2y6m                         |
| New York, USA          | 2002-2004          | 2y                           |
| Shanghai, China        | 2004-2004          | 4m                           |
| Kyoto                  | 2005-present       | 2m                           |
| _____                  | _____              | _____                        |
| _____                  | _____              | _____                        |
| _____                  | _____              | _____                        |
| _____                  | _____              | _____                        |

2. Please describe your occupational history.

|                     |              |
|---------------------|--------------|
| e.g. Household wife | 2000-present |
| Office worker       | 1996-2000    |
| _____               | _____        |
| _____               | _____        |
| _____               | _____        |

3. Please describe how many hours per day you ordinarily use the following household electrical appliances.

A. Personal computer:

1. I use it for ( ) hours per day in the last ( ) years.
2. I seldom use it.

B. Mobile phone

1. I use it for ( ) hours per day in the last ( ) years.
2. I seldom use it.

C. Television

1. I watch it for ( ) hours per day in the last ( ) years.
2. We do not have TV.

D. Other household electric appliance

- D1. \_\_\_\_\_ ( ) hours per day in recent ( ) years.  
D2. \_\_\_\_\_ ( ) hours per day in recent ( ) years.  
D3. \_\_\_\_\_ ( ) hours per day in recent ( ) years.  
D4. \_\_\_\_\_ ( ) hours per day in recent ( ) years.  
D5. \_\_\_\_\_ ( ) hours per day in recent ( ) years.

E. Have you been ordinarily using the following furniture or items in the home or at work?

Carpet

- At home for ( ) years.  
At work for ( ) years.

Cushions

- At home for ( ) years.  
At work for ( ) years.

Sofa

- At home for ( ) years.  
At work for ( ) years.

Curtains

At home for ( ) years.

At work for ( ) years.

Blinds

At home for ( ) years.

At work for ( ) years.

F. Please check which fish you eat regularly.

Yellow tail ( ) times per week

Horse Mackerel or Mackerel ( ) times per week

Salmon ( ) times per week

Other fish,

1. \_\_\_\_\_ ( ) times per week

2. \_\_\_\_\_ ( ) times per week

3. \_\_\_\_\_ ( ) times per week

G. Please describe any medicine(s) or supplement(s) you routinely take.

|      | <u>Medicine or supplement</u> | <u>Frequency</u>                       |
|------|-------------------------------|----------------------------------------|
| e.g. | Aspirin                       | Once a month                           |
|      | Anti-histamine                | Every spring season for pollen allergy |
|      | Vitamin compound              | Every day                              |
|      | _____                         | _____                                  |
|      | _____                         | _____                                  |
|      | _____                         | _____                                  |

H. Please check your smoking and drinking status

Smoking:

- I have never smoked.
- I have never smoked but am passively exposed.
- I am an ex-smoker  
and had smoked (    ) cigarettes/cigars per day  
for (    ) years until the age of (    ) years.
- I am a current smoker.  
I smoke (    ) cigarettes/cigars per day  
for (    ) years until the age of (    ) years.

Drinking:

- I have never been a drinker.
- I am an ex-drinker  
and had drunk (    ) ml / week of [check one : beer, sake, whiskey, wine or  
other (    )] for (    ) years from the age of (    ) to the age of (    ) years.
- I am a current drinker  
and drink (    ) ml / week of [check one : beer, sake, whisky, wine or other  
(    )] for (    ) years.

Thank you for your cooperation. If you have any comments, please describe them below.

---

---

---

---

---

---

---

---

Supplementary table 2. Concentrations of each congener of PBDE in human milk samples (ng/g lipid)

| Area                    | No. of participants | DiBDE #15<br>GM (GSD) | TrBDE #28<br>GM (GSD) | TeBDE #47<br>GM (GSD) | PeBDE #99<br>GM (GSD) | PeBDE #100<br>GM (GSD) | HxBDE #153<br>GM (GSD) | HxBDE #154<br>GM (GSD) | HpBDE #183<br>GM (GSD) | OBDE #196<br>GM (GSD) | OBDE #197<br>GM (GSD) | NBDE #206<br>GM (GSD) | NBDE #207<br>GM (GSD) | DeBDE #209<br>GM (GSD) |
|-------------------------|---------------------|-----------------------|-----------------------|-----------------------|-----------------------|------------------------|------------------------|------------------------|------------------------|-----------------------|-----------------------|-----------------------|-----------------------|------------------------|
| Hokkaido                | 20                  | 0.13 (3.00)           | 0.07 (1.56)           | 0.35 (1.55)           | 0.10 (1.46)           | 0.14 (1.58)            | 0.39 (1.60)            | 0.03 (1.60)            | 0.03 (1.64)            | 0.03 (1.67)           | 0.21 (1.65)           | 0.05 (1.53)           | 0.19 (1.68)           | 0.40 (1.76)            |
| Miyagi                  | 40                  | 0.05 (2.00)           | 0.06 (1.77)           | 0.43 (1.86)           | 0.08 (1.75)           | 0.14 (1.67)            | 0.33 (1.52)            | 0.02 (1.76)            | 0.01 (1.57)            | 0.01 (1.61)           | 0.07 (1.65)           | 0.04 (1.58)           | 0.04 (1.85)           | 0.08 (2.26)            |
| Gifu                    | 20                  | 0.04 (2.45)           | 0.06 (1.69)           | 0.45 (1.71)           | 0.09 (1.91)           | 0.15 (1.52)            | 0.29 (1.52)            | 0.03 (1.49)            | 0.01 (1.64)            | 0.01 (1.58)           | 0.08 (1.36)           | 0.02 (1.00)           | 0.05 (1.46)           | 0.10 (1.57)            |
| Hyogo                   | 9                   | 0.05 (1.98)           | 0.07 (1.90)           | 0.37 (1.74)           | 0.07 (1.28)           | 0.13 (1.98)            | 0.36 (1.81)            | 0.02 (1.79)            | 0.01 (1.60)            | 0.01 (1.32)           | 0.05 (1.48)           | N.D.                  | 0.03 (1.24)           | 0.06 (1.94)            |
| Total                   | 89                  | 0.06 (2.61)           | 0.07 (1.74)           | 0.41 (1.77)           | 0.08 (1.72)           | 0.14 (1.66)            | 0.34 (1.56)            | 0.03 (1.68)            | 0.02 (1.75)            | 0.01 (1.93)           | 0.09 (1.95)           | 0.04 (1.72)           | 0.06 (2.34)           | 0.12 (2.61)            |
| (% of detected samples) |                     | 98.9                  | 100.0                 | 100.0                 | 100.0                 | 100.0                  | 100.0                  | 100.0                  | 97.8                   | 67.4                  | 100.0                 | 11.2                  | 95.5                  | 92.1                   |

N.D.: Under the LOD for all samples.

Supplementary table 3. Concentrations of each congener of PBDE in human serum samples (ng/g lipid)

| Area                    | No. of participants | DiBDE #15<br>GM (GSD) | TrBDE #28<br>GM (GSD) | TeBDE #47<br>GM (GSD) | PeBDE #99<br>GM (GSD) | PeBDE #100<br>GM (GSD) | HxBDE #153<br>GM (GSD) | HxBDE #154<br>GM (GSD) | HpBDE #183<br>GM (GSD) | OBDE #196<br>GM (GSD) | OBDE #197<br>GM (GSD) | NBDE #206<br>GM (GSD) | NBDE #207<br>GM (GSD) | DeBDE #209<br>GM (GSD) |
|-------------------------|---------------------|-----------------------|-----------------------|-----------------------|-----------------------|------------------------|------------------------|------------------------|------------------------|-----------------------|-----------------------|-----------------------|-----------------------|------------------------|
| Hokkaido                | 20                  | 0.06 (2.15)           | 0.06 (1.31)           | 0.33 (1.32)           | 0.10 (1.38)           | 0.11 (1.58)            | 0.31 (1.46)            | 0.05 (1.15)            | 0.06 (1.20)            | 0.11(1.00)            | 0.32 (1.54)           | N.D.                  | 0.42 (1.42)           | 1.12 (1.35)            |
| Miyagi                  | 40                  | 0.06 (1.48)           | 0.07 (1.39)           | 0.43 (1.61)           | 0.12 (1.92)           | 0.13 (1.73)            | 0.35 (1.64)            | 0.07 (1.58)            | 0.06 (1.23)            | 0.11 (1.40)           | 0.26 (1.45)           | 0.40 (1.15)           | 0.35 (1.58)           | 1.75 (2.01)            |
| Gifu                    | 20                  | 0.05 (2.75)           | 0.06 (1.81)           | 0.31 (1.41)           | 0.08 (1.23)           | 0.09 (1.39)            | 0.23 (1.38)            | 0.05 (1.12)            | 0.06 (1.30)            | 0.09 (0.00)           | 0.25 (1.59)           | N.D.                  | 0.32 (1.35)           | 0.64 (1.87)            |
| Hyogo                   | 9                   | 0.05 (1.76)           | 0.07 (1.45)           | 0.33 (1.44)           | 0.08 (1.25)           | 0.11 (1.75)            | 0.35 (1.83)            | 0.05 (1.00)            | 0.06 (1.08)            | N.D.                  | 0.22 (1.35)           | 0.32 (1.00)           | 0.27 (1.13)           | 1.10 (1.84)            |
| Total                   | 89                  | 0.05 (1.74)           | 0.07 (1.39)           | 0.37 (1.56)           | 0.10 (1.70)           | 0.11 (1.71)            | 0.31 (1.67)            | 0.06 (1.50)            | 0.06 (1.50)            | 0.11 (1.34)           | 0.27 (1.51)           | 0.38 (1.17)           | 0.35 (1.52)           | 1.20 (2.05)            |
| (% of detected samples) |                     | 69.7                  | 68.5                  | 100.0                 | 98.9                  | 93.3                   | 100.0                  | 18.0                   | 40.4                   | 6.7                   | 98.9                  | 4.5                   | 98.9                  | 92.1                   |

N.D.: Under the LOD for all samples.

Supplementary table 4. Concentrations of each congener of PCB in human milk samples (ng/g lipid)

| Area                    | No. of participants | TeCB #74<br>GM (GSD) | PeCB #99<br>GM (GSD) | PeCB #118<br>GM (GSD) | HxCB #146<br>GM (GSD) | HxCB #153<br>GM (GSD) | HxCB#164/#163HxCB#138<br>GM (GSD) | HxCB#156<br>GM (GSD) | HpCB#182/#187HpCB #180<br>GM (GSD) | HpCB #170<br>GM (GSD) | OCB #199<br>GM (GSD) | OCB#194<br>GM (GSD) | NCB #206<br>GM (GSD) | DeCB #209<br>GM (GSD) |             |             |
|-------------------------|---------------------|----------------------|----------------------|-----------------------|-----------------------|-----------------------|-----------------------------------|----------------------|------------------------------------|-----------------------|----------------------|---------------------|----------------------|-----------------------|-------------|-------------|
| Hokkaido                | 20                  | 2.30 (1.56)          | 3.02 (1.04)          | 4.15 (1.59)           | 2.00 (1.54)           | 16.90 (1.55)          | 2.40 (1.56)                       | 10.02 (1.50)         | 1.31 (1.64)                        | 4.02 (1.64)           | 7.43 (1.67)          | 2.73 (1.60)         | 0.85 (1.69)          | 0.80 (1.80)           | 0.25 (1.64) | 0.21 (1.63) |
| Miyagi                  | 40                  | 2.36 (1.75)          | 3.67 (1.66)          | 4.87 (1.72)           | 2.28 (1.59)           | 21.40 (1.58)          | 3.24 (1.65)                       | 12.09 (1.63)         | 1.63 (1.63)                        | 4.58 (1.56)           | 8.68 (1.55)          | 3.14 (1.56)         | 0.88 (1.54)          | 0.85 (1.54)           | 0.19 (1.56) | 0.09 (1.67) |
| Gifu                    | 20                  | 1.60 (2.07)          | 2.34 (1.74)          | 3.19 (1.79)           | 1.55 (1.84)           | 13.84 (1.81)          | 2.11 (1.88)                       | 7.97 (1.79)          | 1.01 (1.95)                        | 3.30 (1.70)           | 6.35 (1.70)          | 2.18 (1.70)         | 0.63 (1.58)          | 0.69 (1.61)           | 0.15 (1.51) | 0.07 (1.48) |
| Hyogo                   | 9                   | 4.02 (1.92)          | 4.41 (2.12)          | 6.52 (2.07)           | 3.69 (1.75)           | 27.35 (1.79)          | 4.88 (1.60)                       | 13.69 (1.96)         | 2.26 (1.55)                        | 6.83 (1.69)           | 11.76 (1.60)         | 4.27 (1.58)         | 1.18 (1.58)          | 1.15 (1.60)           | 0.20 (1.47) | 0.08 (1.39) |
| Total                   | 89                  | 2.27 (1.89)          | 3.23 (1.75)          | 4.40 (1.81)           | 2.13 (1.75)           | 18.86 (1.72)          | 2.87 (1.78)                       | 10.69 (1.73)         | 1.44 (1.79)                        | 4.30 (1.69)           | 8.06 (1.67)          | 2.89 (1.67)         | 0.84 (1.64)          | 0.83 (1.65)           | 0.19 (1.61) | 0.10 (1.84) |
| (% of detected samples) |                     | 100                  | 100                  | 100                   | 100                   | 100                   | 100                               | 100                  | 100                                | 100                   | 100                  | 100                 | 100                  | 100                   | 98.9        | 96.6        |

Supplementary table5. Concentrations of each congener of PCB in human serum samples (ng/g lipid)

| Area                    | No. of participants | TeCB #74<br>GM (GSD) | PeCB #99<br>GM (GSD) | PeCB #118<br>GM (GSD) | HxCB #146<br>GM (GSD) | HxCB #153<br>GM (GSD) | HxCB #164/#163<br>GM (GSD) | HxCB #138<br>GM (GSD) | HxCB #156<br>GM (GSD) | HpCB #182/#187<br>GM (GSD) | HpCB #180<br>GM (GSD) | HpCB #170<br>GM (GSD) | OCB #199<br>GM (GSD) | OCB #194<br>GM (GSD) | NCB #206<br>GM (GSD) | DeCB #209<br>GM (GSD) |
|-------------------------|---------------------|----------------------|----------------------|-----------------------|-----------------------|-----------------------|----------------------------|-----------------------|-----------------------|----------------------------|-----------------------|-----------------------|----------------------|----------------------|----------------------|-----------------------|
| Hokkaido                | 20                  | 1.40 (1.59)          | 1.87 (1.57)          | 2.57 (1.65)           | 1.06 (1.62)           | 10.03 (1.65)          | 1.59 (1.70)                | 6.12 (1.55)           | 0.76 (1.73)           | 2.44 (1.74)                | 4.61 (1.74)           | 1.68 (1.69)           | 0.50 (1.78)          | 0.62 (1.71)          | 0.27 (1.54)          | 0.24 (1.40)           |
| Miyagi                  | 40                  | 1.38 (1.95)          | 1.92 (1.83)          | 2.99 (1.90)           | 1.33 (1.79)           | 12.62 (1.75)          | 2.09 (1.90)                | 7.28 (1.78)           | 0.99 (1.81)           | 3.25 (1.69)                | 6.90 (1.64)           | 2.25 (1.71)           | 0.81 (1.57)          | 0.87 (1.55)          | 0.35 (1.50)          | 0.28 (1.38)           |
| Gifu                    | 20                  | 0.72 (2.01)          | 1.02 (1.82)          | 1.50 (1.89)           | 0.70 (1.88)           | 6.05 (1.92)           | 1.02 (2.04)                | 3.38 (1.91)           | 0.52 (1.96)           | 1.81 (1.77)                | 3.42 (1.75)           | 1.19 (1.81)           | 0.46 (1.70)          | 0.54 (1.73)          | 0.25 (1.47)          | 0.21 (1.36)           |
| Hyogo                   | 9                   | 1.83 (2.04)          | 2.16 (2.22)          | 3.43 (2.28)           | 1.69 (1.95)           | 14.79 (1.91)          | 2.87 (1.85)                | 6.95 (2.12)           | 1.19 (1.61)           | 4.47 (1.84)                | 8.09 (1.75)           | 2.82 (1.72)           | 1.00 (1.68)          | 1.15 (1.64)          | 0.42 (1.60)          | 0.25 (1.39)           |
| Total                   | 89                  | 1.24 (2.02)          | 1.69 (1.92)          | 2.51 (2.00)           | 1.13 (1.91)           | 10.33 (1.93)          | 1.73 (2.04)                | 5.87 (1.94)           | 0.83 (1.91)           | 2.76 (1.86)                | 5.47 (1.85)           | 1.87 (1.86)           | 0.65 (1.79)          | 0.75 (1.74)          | 0.32 (1.56)          | 0.25 (1.41)           |
| (% of detected samples) |                     | 98.9                 | 98.9                 | 100                   | 98.9                  | 100                   | 100                        | 100                   | 97.8                  | 100                        | 100                   | 100                   | 98.9                 | 97.8                 | 80.9                 | 79.8                  |



Supplementary table 6. Parameters used in the QSAR analysis for PBDEs and PCBs.

|                | No. of paired samples analyzed | Log P <sup>a</sup> | Log Kow | MW    | Reference                        |
|----------------|--------------------------------|--------------------|---------|-------|----------------------------------|
| <b>PCBs</b>    |                                |                    |         |       |                                  |
| TeCB #74       | 88                             | 0.293              | 6.2     | 292.0 | Hawker and Connell 1988          |
| PeCB #99       | 88                             | 0.306              | 6.4     | 326.4 | Hawker and Connell 1988          |
| PeCB #118      | 89                             | 0.259              | 6.7     | 326.4 | Hawker and Connell 1988          |
| HxCB #146      | 88                             | 0.303              | 6.9     | 360.9 | Hawker and Connell 1988          |
| HxCB #153      | 89                             | 0.279              | 6.9     | 360.9 | Hawker and Connell 1988          |
| HxCB #164/#163 | 89                             | 0.246              | 7.0     | 360.9 | Hawker and Connell 1988          |
| HxCB #138      | 89                             | 0.281              | 6.4     | 360.9 | Hawker and Connell 1988          |
| HxCB #156      | 87                             | 0.271              | 7.2     | 360.9 | Hawker and Connell 1988          |
| HpCB #182/#187 | 89                             | 0.214              | 7.2     | 395.3 | Hawker and Connell 1988          |
| HpCB #180      | 89                             | 0.190              | 7.4     | 395.3 | Hawker and Connell 1988          |
| HpCB #170      | 89                             | 0.209              | 7.3     | 395.3 | Hawker and Connell 1988          |
| OCB #199       | 88                             | 0.137              | 7.2     | 429.7 | Hawker and Connell 1988          |
| OCB #194       | 87                             | 0.079              | 7.8     | 429.7 | Hawker and Connell 1988          |
| NCB #206       | 72                             | -0.137             | 8.1     | 464.2 | Hawker and Connell 1988          |
| DeCB #209      | 70                             | -0.297             | 8.2     | 498.6 | Hawker and Connell 1988          |
| <b>PBDEs</b>   |                                |                    |         |       |                                  |
| DiBDE #15      | 62                             | 0.303              | 5.8     | 328.0 | Palm et al. 2002                 |
| TriBDE #28     | 61                             | 0.076              | 5.9     | 406.9 | Braekevelt et al. 2003           |
| TeBDE #47      | 89                             | 0.070              | 6.8     | 485.8 | Braekevelt et al. 2003           |
| PeBDE #99      | 88                             | -0.012             | 7.3     | 564.7 | Braekevelt et al. 2003           |
| PeBDE #100     | 83                             | 0.155              | 7.2     | 564.7 | Braekevelt et al. 2003           |
| HxBDE #153     | 89                             | 0.066              | 7.9     | 643.6 | Braekevelt et al. 2003           |
| OBDE #197      | 88                             | -0.406             | 8.7     | 880.2 | European Chemicals Bureau. 2003. |
| NBDE #207      | 84                             | -0.663             | 9.3     | 880.3 | European Chemicals Bureau. 2003. |
| DeBDE #209     | 89                             | -0.751             | 9.9     | 959.1 | European Chemicals Bureau. 2003. |

<sup>a</sup>Log P is observed value. P is milk/serum partition coefficient.
